# Supplementary material for: Genome-Wide Scanning of Potential Hotspots for Adenosine Methylation: A Potential Path to Neuronal Development
Source: MDPI journal article supplement (doi:10.3390/life11111185), 2021-11-05
Supplement: s1 [file s1]

# Supplementary Material of Genome-Wide Scanning of Potential Hotspots for Adenosine Methylation: A Potential Path to Neuronal Development

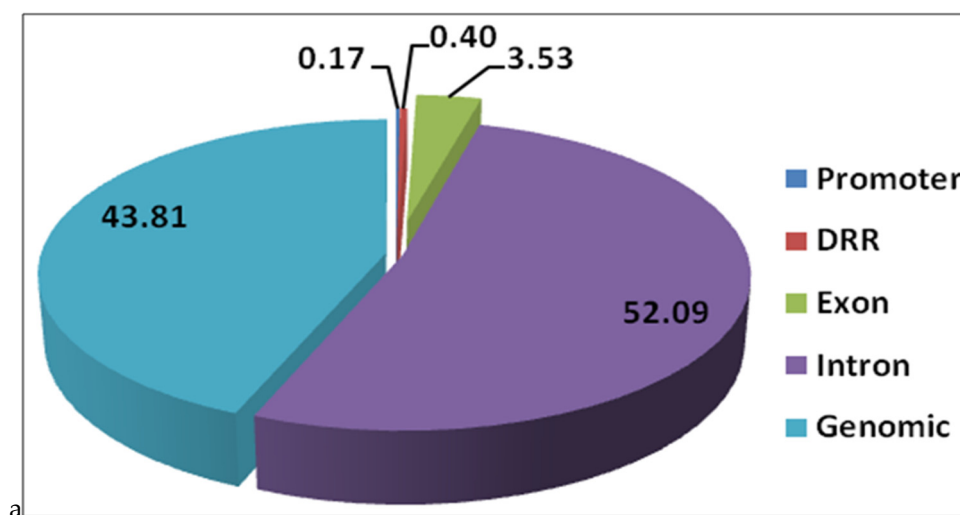

Figure S1. Percentage distribution of target sequences in different regions of human genome.

Table S1. Enrichment Analysis of genes for their biological functions.

| Enrichment FDR | Genes in List | Total Genes | Functional Category                                   | Genes                                                                                                                                                                  |
|----------------|---------------|-------------|-------------------------------------------------------|------------------------------------------------------------------------------------------------------------------------------------------------------------------------|
| 1.98E-20       | 25            | 2474        | Nervous system development                            | NTRK3 NLGN4X PAK1 SHANK2 MAP2K1 EP300 NRXN3 CAMK2B PSEN1 DPYSL2 NRP1 MAPK1 SH3GL2 RAP1A NUMB EGFR ADCY1 NRXN1 PLCB1 GRIN2A SIPA1L1 NRXN2 GRIN2B <b>RPS6KA5 RPS6KA3</b> |
| 4.63E-18       | 19            | 1008        | Neuron projection development                         | NTRK3 PAK1 SHANK2 EP300 PSEN1 DPYSL2 NRP1 SH3GL2 RAP1A NUMB EGFR ADCY1 MAP2K1 SIPA1L1 NRXN1 CAMK2B NRXN3 MAPK1 RPS6KA5                                                 |
| 5.91E-18       | 17            | 680         | Plasma membrane bounded cell projection morphogenesis | PAK1 SHANK2 PSEN1 DPYSL2 NRP1 SH3GL2 NUMB NTRK3 EGFR ADCY1 MAP2K1 SIPA1L1 CAMK2B NRXN3 MAPK1 RPS6KA5 NRXN1                                                             |
| 5.91E-18       | 17            | 666         | Neuron projection morphogenesis                       | PAK1 SHANK2 PSEN1 DPYSL2 NRP1 SH3GL2 NUMB NTRK3 EGFR ADCY1 MAP2K1 SIPA1L1 CAMK2B NRXN3 MAPK1 RPS6KA5 NRXN1                                                             |
| 5.91E-18       | 17            | 682         | Cell projection morphogenesis                         | PAK1 SHANK2 PSEN1 DPYSL2 NRP1 SH3GL2 NUMB NTRK3 EGFR ADCY1 MAP2K1 SIPA1L1 CAMK2B NRXN3 MAPK1 <b>RPS6KA5</b> NRXN1                                                      |
| 7.84E-18       | 17            | 701         | Cell part morphogenesis                               | PAK1 SHANK2 PSEN1 DPYSL2 NRP1 SH3GL2 NUMB NTRK3 EGFR ADCY1 MAP2K1 SIPA1L1 CAMK2B NRXN3 MAPK1 <b>RPS6KA5</b> NRXN1                                                      |
| 1.21E-17       | 21            | 1683        | Neurogenesis                                          | NTRK3 PAK1 SHANK2 MAP2K1 EP300 PSEN1 DPYSL2 NRP1 MAPK1 SH3GL2 RAP1A NUMB EGFR ADCY1 GRIN2A SIPA1L1 NRXN1 CAMK2B NLGN4X NRXN3 <b>RPS6KA5</b>                            |
| 1.31E-17       | 20            | 1412        | Neuron differentiation                                | NTRK3 PAK1 SHANK2 MAP2K1 EP300 PSEN1 DPYSL2 NRP1 SH3GL2 RAP1A NUMB EGFR ADCY1 SIPA1L1 NRXN1 CAMK2B NLGN4X NRXN3 MAPK1 <b>RPS6KA5</b>                                   |
| 1.31E-17       | 19            | 1154        | Neuron development                                    | NTRK3 PAK1 SHANK2 EP300 PSEN1 DPYSL2 NRP1 SH3GL2 RAP1A NUMB EGFR ADCY1 MAP2K1 SIPA1L1 NRXN1 CAMK2B NRXN3 MAPK1 <b>RPS6KA5</b>                                          |
| 7.28E-17       | 20            | 1552        | Plasma membrane bounded cell projection organization  | NTRK3 PAK1 SHANK2 EP300 PSEN1 DPYSL2 NRP1 SH3GL2 RAP1A NUMB EGFR ADCY1 MAP2K1 SIPA1L1 NRXN1 CAMK2B GRIN2B NRXN3 MAPK1 <b>RPS6KA5</b>                                   |
| 7.28E-17       | 13            | 272         | Learning or memory                                    | PLCB1 PSEN1 EP300 EGFR SHANK2 ADCY1 <b>NRXN1</b> GRIN2A <b>NRXN3</b> NRXN2 NLGN4X GRIN2B MAPK1                                                                         |
| 8.24E-17       | 18            | 1054        | Central nervous system development                    | SHANK2 PSEN1 DPYSL2 NRP1 MAPK1 NUMB NTRK3 EGFR PAK1 ADCY1 MAP2K1 PLCB1 NLGN4X <b>NRXN1</b> GRIN2A GRIN2B SH3GL2 <b>RPS6KA3</b>                                         |
| 8.24E-17       | 20            | 1575        | Generation of neurons                                 | NTRK3 PAK1 SHANK2 MAP2K1 EP300 PSEN1 DPYSL2 NRP1 SH3GL2 RAP1A NUMB EGFR ADCY1 SIPA1L1 <b>NRXN1</b> CAMK2B NLGN4X <b>NRXN3</b> MAPK1 <b>RPS6KA5</b>                     |

|          |    |      |                                                          |                                                                                                                                                          |
|----------|----|------|----------------------------------------------------------|----------------------------------------------------------------------------------------------------------------------------------------------------------|
| 8.68E-17 | 20 | 1589 | Cell projection organization                             | NTRK3 PAK1 SHANK2 EP300 PSEN1 DPYSL2 NRP1 SH3GL2 RAP1A NUMB<br>EGFR ADCY1 MAP2K1 SIPA1L1 <b>NRXN1</b> CAMK2B GRIN2B <b>NRXN3</b> MAPK1<br><b>RPS6KA5</b> |
| .88E-17  | 18 | 1067 | Cell morphogenesis                                       | PAK1 SHANK2 PSEN1 DPYSL2 NRP1 EP300 SH3GL2 NUMB NTRK3 EGFR<br>ADCY1 MAP2K1 SIPA1L1 CAMK2B <b>NRXN3</b> MAPK1 <b>RPS6KA5NRXN1</b>                         |
| 4.41E-16 | 18 | 1172 | Cellular component<br>morphogenesis                      | PAK1 SHANK2 PSEN1 DPYSL2 NRP1 EP300 SH3GL2 NUMB NTRK3 EGFR<br>ADCY1 MAP2K1 SIPA1L1 CAMK2B <b>NRXN3</b> MAPK1 <b>RPS6KA5NRXN1</b>                         |
| 4.75E-16 | 16 | 756  | Cell morphogenesis involved<br>in differentiation        | PAK1 SHANK2 PSEN1 DPYSL2 NRP1 EP300 NUMB NTRK3 ADCY1 MAP2K1<br>SIPA1L1 CAMK2B <b>NRXN3</b> MAPK1 RPS6KA5 <b>NRXN1</b>                                    |
| 4.75E-16 | 13 | 325  | Cognition                                                | PLCB1 PSEN1 EP300 EGFR SHANK2 ADCY1 <b>NRXN1</b> GRIN2A <b>NRXN3NRXN2</b><br>NLGN4X GRIN2B MAPK1                                                         |
| 5.99E-16 | 15 | 598  | Cell morphogenesis involved<br>in neuron differentiation | PAK1 SHANK2 PSEN1 DPYSL2 NRP1 NUMB NTRK3 ADCY1 MAP2K1 SIPA1L1<br>CAMK2B <b>NRXN3</b> MAPK1 RPS6KA5 <b>NRXN1</b>                                          |
| 8.52E-16 | 14 | 468  | Regulation of trans-synaptic<br>signaling                | NLGN4X SHANK2 GRIN2A GRIN2B <b>NRXN3</b> PSEN1 MAPK1 RAP1A EGFR<br>ADCY1 <b>NRXN1</b> PLCB1 SIPA1L1 CAMK2B                                               |
